# Supplementary material for: Association of Fish Consumption and Mercury Exposure During Pregnancy With Metabolic Health and Inflammatory Biomarkers in Children
Source: PubMed Central journal article supplement (PMC7076335; doi:10.1001/jamanetworkopen.2020.1007), 2020-03-16
Supplement: jamanetwopen-3-e201007-s001.pdf [file jamanetwopen-3-e201007-s001.pdf]

## Supplementary Online Content

Stratakis N, Conti DV, Borrás E, et al. Association of fish consumption and mercury exposure during pregnancy with metabolic health and inflammatory biomarkers in children. *JAMA Netw Open*. 2020;3(3):e201007.  
doi:10.1001/jamanetworkopen.2020.1007

**eMethods 1.** Measurement of Mercury Levels During Pregnancy

**eMethods 2.** Measurement of Inflammatory Biomarkers and Adipokines in Children

**eMethods 3.** Covariates

**eMethods 4.** Structural Integrated Latent Variable Analysis

**eTable 1.** Description of Cohort-Specific Food Questionnaires Used to Assess Maternal Diet During Pregnancy

**eTable 2.** Comparison of Characteristics of the Study Population (N = 805) by Categories of Maternal Fish Consumption During Pregnancy

**eTable 3.** Associations of Fish Intake During Pregnancy and Maternal Mercury Levels With Metabolic Syndrome Score Among Children Aged 8 Years in HELIX after Stratifying for Child Sex, Maternal Education Level, and Gestational Diabetes Status

**eTable 4.** Associations of Fish Intake During Pregnancy and Maternal Mercury Levels With Metabolic Syndrome Score Among Children Aged 8 Years in HELIX (N = 805) After Further Adjusting for Gestational Weight Gain, Breastfeeding, Child Sedentary Behavior, Child Mercury Concentration, and a Number of Maternal and Child Food Indicators of Diet Quality

**eTable 5.** Associations of Fish Intake During Pregnancy and Maternal Mercury Levels With Metabolic Syndrome Score Among Children Aged 8 Years in HELIX (N = 805) After Further Adjusting for Maternal Plasma Levels of Polychlorinated Biphenyls, Dichlorodiphenyldichloroethylene, and Arsenic

**eTable 6.** Associations of Fish Intake During Pregnancy and Maternal Mercury Concentrations With Protein Levels Among Children Aged 8 Years in HELIX (N = 805)

**eTable 7.** Distribution of Exposure and Proteins in Subgroups From the Latent Integrated Analysis Defined With Individuals Assigned to the Most Likely Cluster

**eFigure 1.** Directed Acyclic Graph on the Association of Maternal Fish Intake During Pregnancy and Metabolic Health in Children

**eFigure 2.** Associations of Fish Intake During Pregnancy and Maternal Mercury Levels With Metabolic Syndrome Score Among Children Aged 8 Years in HELIX After Omitting 1 Cohort at a Time

### **eReferences.**

This supplementary material has been provided by the authors to give readers additional information about their work.

© 2020 Stratakis N et al. *JAMA Network Open*.

## **eMethods 1. Measurement of Mercury Levels During Pregnancy**

Maternal blood samples were collected in mid-pregnancy for MoBa (18.7 (0.9) weeks) and RHEA (14.1 (3.7) weeks), in late pregnancy for BiB (26.6 (1.4) weeks) and EDEN (26.1 (1.2) weeks), while, for INMA, we collected cord blood samples at delivery. The HELIX project measured whole blood mercury concentration in MoBa, RHEA, BiB, and EDEN cohorts in the same laboratory (ALS Scandinavia, Sweden) using biological samples stored in the cohort biobanks and utilized existing cord blood mercury measurements for INMA performed in the Public Health Laboratory in Alava (Spain). Mercury concentration in whole blood samples was determined using inductively coupled plasma mass spectrometry. Mercury in cord blood was measured using thermal decomposition, amalgamation and atomic absorption spectrometry. Details of the analytical procedures used for the HELIX project have been described previously.<sup>1</sup>

## **eMethods 2.** Measurement of Inflammatory Biomarkers and Adipokines in Childhood

Blood samples were randomized and blocked by cohort prior to measurement to ensure a representation of each cohort in each plate (batch). For protein quantification, an 8-point calibration curve per plate was performed with protein standards provided in the Luminex kit and following the procedures described in the standard procedures described by the vendor. Commercial heat inactivated, sterile-filtered plasma from human male AB plasma (Sigma Cat #. H3667) was used as constant controls to control for intra- and inter-plate variability. Four control samples were added per plate. Raw intensities obtained with the xMAP and Luminex system for each sample were converted to pg/mL using the calculated standard curves of each plate and accounting for the dilutions that were made prior measurement. The proportion of coefficients of variation (% CV) for each protein, estimated by plate and then averaged, ranged from 3.42% to 36%. For each protein, the LOD was determined and the lower and upper quantification limits (LOQ1 and LOQ2, respectively) were obtained from the calibration curves. Proteins were not used if 30% of samples were outside of the linear range of quantification. Protein data were log<sub>2</sub>-transformed to achieve normal distribution. Plate batch effect was then corrected by subtracting for each individual and each protein the difference between the overall protein average minus the plate specific protein average. Finally, values below LOQ1 and above LOQ2 were imputed using a truncated normal distribution using the `truncdist` R package.

### **eMethods 3. Covariates**

Potential confounding variables and effect modifiers were harmonized among the cohorts. Information on pre-pregnancy BMI (in kg/m<sup>2</sup>), gestational diabetes status (yes, no; diagnosis based on universal screening [BiB, EDEN, RHEA and MoBa] or selective screening among high-risk women [INMA]), maternal age at birth (in years), and parity (primiparous, multiparous) was obtained through interviews and medical records. Information on parental education (cohort-specific definition of low, middle, high), breastfeeding (yes, no), child ethnicity (Caucasian, Asian, Other; mother-reported), child sedentary behavior (in minutes/week), and child consumption of fast-food, sugar-sweetened beverages, sweets, and fish intake (in times/week) was collected with interviews or self-administered questionnaires. Moreover, we assessed levels of polychlorinated biphenyls (PCBs; the 118, 138, 153, 170, and 180 congeners), dichlorodiphenyldichloroethylene (DDE) and arsenic in maternal serum or plasma samples and mercury levels in child whole blood samples as described previously.<sup>1</sup>

#### **eMethods 4.** Structural Integrated Latent Variable Analysis

A model describing the MetS score ( $Y$ ) as a function of cluster,  $C$  is  $(\mu_Y) = \gamma_0 + \gamma_S C$ , where  $\gamma_S$  represents the effect of each estimated cluster  $C$ , on the outcome  $Y$ . The clusters are defined as a multivariate normal model,  $M \sim MVN(C\theta, \Sigma)$ , where  $\theta$  represents mean differences of the protein levels  $M$  by clusters, and  $\Sigma$  represents the correlation of protein profiles by  $C$ . This component of the model is similar to the iCluster approach. The estimation of the  $k$  clusters,  $C$ , follows a multinomial model with a linear predictor as a function of the exposures  $X$ , giving  $\Pr(C=k | X)$ , with corresponding effect estimates. In this model we include both fish consumption and mercury as main effects, and do not include an interaction term between these two factors. However, as both factors are in the linear predictor they both impact the probability of each estimated latent cluster. To estimate the overall integrated model, we treat cluster estimation as a missing data problem, where we use the Expectation-Maximization (E-M) algorithm for estimation with the E-step using the conditional probabilities, and M-step using the expected log-likelihood from the E-step maximized with respect to the parameters.<sup>2</sup> Although this can include the outcome in a supervised clustering approach, in this analysis, we define the clusters from the protein profiles and exposure variables only and then test the association of these clusters to MetS score. For the estimation of the number of latent clusters, we use Bayesian Information Criteria.

**eTable 1.** Description of Cohort-Specific Food Questionnaires Used to Assess Maternal Diet During Pregnancy

|      | <b>Time of Administration</b>           | <b>Number of Food Items</b> | <b>Period Covered</b>     | <b>Type of Validation</b>                                                                         |
|------|-----------------------------------------|-----------------------------|---------------------------|---------------------------------------------------------------------------------------------------|
| BiB  | 26 <sup>th</sup> –28 <sup>th</sup> week | 54                          | 2 <sup>nd</sup> trimester | -                                                                                                 |
| EDEN | Few days after delivery                 | 137                         | 3 <sup>rd</sup> trimester | 4 x 24-h dietary recalls                                                                          |
| MoBa | 17 <sup>th</sup> -18 <sup>th</sup> week | 250                         | 1 <sup>st</sup> half      | 1 x 4-day weighed food diary & urinary and blood biomarkers of nutrients and/or major food groups |
| Rhea | 14 <sup>th</sup> –18 <sup>th</sup> week | 250                         | 1 <sup>st</sup> half      | 3 x 24-h dietary recalls                                                                          |
| INMA | 10 <sup>th</sup> –13 <sup>th</sup> week | 101                         | 1 <sup>st</sup> trimester | Blood biomarkers of nutrients & 4 x 1 week food records                                           |

Abbreviations: BiB, Born in Bradford cohort; EDEN, the Étude des Déterminants pré et postnatals du développement et de la santé de l'Enfant study; INMA, INfancia y Medio Ambiente cohort; MoBa, Norwegian Mother, Father and Child Cohort Study; RHEA, Rhea Mother Child Cohort study.

**eTable 2.** Comparison of Characteristics of the Study Population (N = 805) by Categories of Maternal Fish Consumption During Pregnancy

|                                                          | Fish Consumption During Pregnancy          |                                                                  |                                             |
|----------------------------------------------------------|--------------------------------------------|------------------------------------------------------------------|---------------------------------------------|
|                                                          | Low<br>( $<1$<br>times/week<br>)<br>N= 117 | Moderate<br>( $\geq 1$ but $\leq 3$<br>times/week<br>)<br>N= 317 | High<br>( $>3$<br>times/week<br>)<br>N= 371 |
| <b>Parental characteristics</b>                          |                                            |                                                                  |                                             |
| Maternal age, mean (SD), years                           | 30.6 (4.8) <sup>a</sup>                    | 30.9 (5) <sup>a</sup>                                            | 31.9 (4.2) <sup>b</sup>                     |
| Missing, n (%)                                           | 1 ( $<1$ )                                 | 1 ( $<1$ )                                                       | 1 ( $<1$ )                                  |
| Maternal pre-pregnancy BMI, mean (SD), kg/m <sup>2</sup> | 24.4 (4.7) <sup>a</sup>                    | 24.2 (4.3) <sup>a</sup>                                          | 23.7 (4.3) <sup>a</sup>                     |
| Normal weight ( $<25$ kg/m <sup>2</sup> ), n (%)         | 78 (67) <sup>a</sup>                       | 208 (66) <sup>a</sup>                                            | 266 (72) <sup>a</sup>                       |
| Overweight ( $\geq 25$ kg/m <sup>2</sup> ), n (%)        | 36 (31) <sup>a</sup>                       | 105 (33) <sup>a</sup>                                            | 102 (27) <sup>a</sup>                       |
| Missing, n (%)                                           | 3 (3)                                      | 4 (1)                                                            | 3 ( $<1$ )                                  |
| Maternal smoking in pregnancy, n (%)                     |                                            |                                                                  |                                             |
| No                                                       | 94 (80) <sup>a</sup>                       | 259 (82) <sup>a</sup>                                            | 309 (83) <sup>a</sup>                       |
| Yes                                                      | 21 (18) <sup>a</sup>                       | 54 (17) <sup>a</sup>                                             | 56 (15) <sup>a</sup>                        |
| Missing                                                  | 2 (2)                                      | 4 (1)                                                            | 6 (2)                                       |
| Gestational diabetes, n (%)                              |                                            |                                                                  |                                             |
| No                                                       | 98 (83) <sup>a</sup>                       | 163 (51) <sup>a</sup>                                            | 123 (33) <sup>a</sup>                       |
| Yes                                                      | 10 (9) <sup>a</sup>                        | 22 (7) <sup>a</sup>                                              | 9 (3) <sup>a</sup>                          |
| Missing                                                  | 9 (8)                                      | 132 (42)                                                         | 239 (64)                                    |
| Parity, n (%)                                            |                                            |                                                                  |                                             |
| Primiparous                                              | 53 (45) <sup>a</sup>                       | 130 (41) <sup>b</sup>                                            | 185 (50) <sup>b</sup>                       |
| Multiparous                                              | 62 (53) <sup>a</sup>                       | 185 (58) <sup>b</sup>                                            | 185 (50) <sup>b</sup>                       |
| Missing                                                  | 2 (2)                                      | 2 ( $<1$ )                                                       | 1 ( $<1$ )                                  |
| Maternal educational level, n (%)                        |                                            |                                                                  |                                             |
| Low                                                      | 4 (3) <sup>a</sup>                         | 45 (14) <sup>b</sup>                                             | 57 (15) <sup>b</sup>                        |
| Medium                                                   | 60 (51) <sup>a</sup>                       | 109 (34) <sup>b</sup>                                            | 114 (31) <sup>b</sup>                       |
| High                                                     | 51 (44) <sup>a</sup>                       | 155 (49) <sup>b</sup>                                            | 194 (52) <sup>b</sup>                       |
| Missing                                                  | 2 (2)                                      | 8 (3)                                                            | 6 (2)                                       |
| Paternal educational level, n (%)                        |                                            |                                                                  |                                             |
| Low                                                      | 12 (10) <sup>a</sup>                       | 47 (15) <sup>b</sup>                                             | 71 (19) <sup>b</sup>                        |
| Medium                                                   | 61 (52) <sup>a</sup>                       | 114 (36) <sup>b</sup>                                            | 119 (32) <sup>b</sup>                       |
| High                                                     | 40 (34) <sup>a</sup>                       | 123 (39) <sup>b</sup>                                            | 168 (45) <sup>b</sup>                       |
| Missing                                                  | 4 (3)                                      | 33 (10)                                                          | 13 (4)                                      |
| Maternal mercury $\geq 3.5$ $\mu$ g/L, n (%)             | 36 (31) <sup>a</sup>                       | 79 (25) <sup>a</sup>                                             | 155 (42) <sup>b</sup>                       |
| <b>Child characteristics</b>                             |                                            |                                                                  |                                             |
| Age at assessment, mean (SD), years                      | 7.7 (1.8) <sup>a</sup>                     | 8.4 (1.8) <sup>b</sup>                                           | 8.6 (1.1) <sup>b</sup>                      |
| Sex, n (%)                                               |                                            |                                                                  |                                             |
| Male                                                     | 70 (60) <sup>a</sup>                       | 183 (58) <sup>a</sup>                                            | 200 (54) <sup>a</sup>                       |
| Female                                                   | 47 (40) <sup>a</sup>                       | 134 (42) <sup>a</sup>                                            | 171 (46) <sup>a</sup>                       |
| Birthweight, mean (SD), grams                            | 3268 (472) <sup>a</sup>                    | 3350 (479) <sup>a</sup>                                          | 3371 (498) <sup>a</sup>                     |
| Missing, n (%)                                           | 1 ( $<1$ )                                 | -                                                                | -                                           |
| Gestational age, mean (SD), weeks                        | 38.7 (1.8) <sup>a</sup>                    | 39.6 (1.7) <sup>b</sup>                                          | 40 (1.6) <sup>c</sup>                       |
| Missing, n (%)                                           | 1 ( $<1$ )                                 | -                                                                | -                                           |
| Ethnicity, n (%)                                         |                                            |                                                                  |                                             |
| Caucasian                                                | 117 (100) <sup>a</sup>                     | 276 (87) <sup>b</sup>                                            | 341 (92) <sup>c</sup>                       |
| Asian                                                    | -                                          | 28 (9) <sup>b</sup>                                              | 27 (7) <sup>c</sup>                         |
| Other                                                    | -                                          | 13 (4) <sup>b</sup>                                              | 3 (1) <sup>c</sup>                          |

<sup>a-c</sup>Values indicate significant differences between the categories of maternal fish intake at an alpha level of .05.

**eTable 3.** Associations of Fish Intake During Pregnancy and Maternal Mercury Levels With Metabolic Syndrome Score Among Children Aged 8 Years in HELIX After Stratifying for Child Sex, Maternal Education Level, and Gestational Diabetes Status

|                                | Metabolic syndrome score |                      | P-interaction |
|--------------------------------|--------------------------|----------------------|---------------|
|                                | Estimate (95% CI)        |                      |               |
| Sex                            | Boys (n=453)             | Girls (n=352)        |               |
| Fish intake, times/week        |                          |                      | 0.44          |
| <1                             | Ref.                     | Ref.                 |               |
| ≥1 but ≤3                      | -0.85 (-1.54, -0.16)     | -1.02 (-1.91, -0.14) |               |
| >3                             | -0.70 (-1.50, 0.10)      | -0.62 (-1.63, 0.38)  |               |
| Mercury, log <sub>2</sub> µg/L | 0.03 (-0.20, 0.25)       | 0.30 (0.06, 0.55)    | 0.12          |
| Maternal education             | Low/medium (n=389)       | High (n=400)         |               |
| Fish intake, times/week        |                          |                      | 0.61          |
| <1                             | Ref.                     | Ref.                 |               |
| ≥1 but ≤3                      | -1.06 (-1.87, -0.25)     | -0.84 (-1.56, -0.11) |               |
| >3                             | -0.82 (-1.80, 0.16)      | -0.59 (-1.40, 0.22)  |               |
| Mercury, log <sub>2</sub> µg/L | 0.18 (-0.06, 0.43)       | 0.21 (-0.01, 0.44)   | 0.90          |
| Gestational diabetes           | No (n=389)               | Yes (n=41)           |               |
| Fish intake, times/week        |                          |                      | 0.85          |
| <1                             | Ref.                     | Ref.                 |               |
| ≥1 but ≤3                      | -1.03 (-1.66, -0.4)      | -2.41 (-4.38, -0.43) |               |
| >3                             | -0.12 (-0.96, 0.73)      | -2.36 (-4.96, 0.23)  |               |
| Mercury, log <sub>2</sub> µg/L | 0.18 (-0.06, 0.41)       | 0.24 (-0.66, 1.14)   | 0.35          |

Abbreviations: MetS, metabolic syndrome.

<sup>a</sup>The MetS score is expressed in standard deviations and was derived using z-scores for waist circumference, systolic and diastolic blood pressure, high-density lipoprotein cholesterol, triglycerides, and insulin, as described in the Methods section. Estimates are beta coefficients (95% CI) calculated by a linear regression model mutually including maternal fish intake and mercury levels and further adjusted for cohort, maternal age, maternal pre-pregnancy BMI, maternal education (for models not stratified by this variable), paternal education, parity, and child ethnicity.

<sup>b</sup>P for interaction calculated by including a cross-product term between the potential effect modifier and maternal fish intake or mercury levels.



**eTable 4.** Associations of Fish Intake During Pregnancy and Maternal Mercury Levels With Metabolic Syndrome Score Among Children Aged 8 Years in HELIX (N = 805) After Further Adjusting for Gestational Weight Gain, Breastfeeding, Child Sedentary Behavior, Child Mercury Concentration, and a Number of Maternal and Child Food Indicators of Diet Quality

|                                | MetS Score <sup>a</sup> |         |
|--------------------------------|-------------------------|---------|
|                                | Estimate (95% CI)       | P Value |
| Fish intake, times/week        |                         |         |
| <1                             | Ref.                    |         |
| ≥1 but ≤3                      | -0.97 (-1.51, -0.43)    | <0.001  |
| >3                             | -0.75 (-1.38, -0.11)    | 0.02    |
| Mercury, log <sub>2</sub> µg/L | 0.19 (0.03, 0.36)       | 0.02    |

Abbreviations: MetS, metabolic syndrome.

<sup>a</sup>The MetS score is expressed in standard deviations and was derived using z-scores for waist circumference, systolic and diastolic blood pressure, high-density lipoprotein cholesterol, triglycerides, and insulin, as described in the Methods section. Estimates are beta coefficients (95% CI) calculated by a linear regression model mutually including maternal fish intake and mercury levels and further adjusted for cohort, maternal age, maternal pre-pregnancy BMI, gestational weight gain, maternal consumption of fruits and vegetables, cereals, and fast food during pregnancy, parental education, parity, child ethnicity, breastfeeding, child sedentary behavior, child mercury levels, and child consumption of total sweets, sugar-sweetened beverages, fast food, and fish. Mean variance inflation factor was 2.5, with all variance inflation factors for the predictors in the model being <10.

**eTable 5.** Associations of Fish Intake During Pregnancy and Maternal Mercury Levels With Metabolic Syndrome Score Among Children Aged 8 Years in HELIX (N = 805) After Further Adjusting for Maternal Plasma Levels of Polychlorinated Biphenyls, Dichlorodiphenyldichloroethylene, and Arsenic

|                                | MetS Score <sup>a</sup> |         |
|--------------------------------|-------------------------|---------|
|                                | Estimate (95% CI)       | P Value |
| Fish intake, times/week        |                         |         |
| <1                             | Ref.                    |         |
| ≥1 but ≤3                      | -0.97 (-1.51, -0.43)    | <0.001  |
| >3                             | -0.71 (-1.34, -0.08)    | 0.03    |
| Mercury, log <sub>2</sub> µg/L | 0.18 (0.01, 0.36)       | 0.04    |

Abbreviations: MetS, metabolic syndrome

<sup>a</sup>The MetS score is expressed in standard deviations and was derived using z-scores for waist circumference, systolic and diastolic blood pressure, high-density lipoprotein cholesterol, triglycerides, and insulin, as described in the Methods section. Estimates are beta coefficients (95% CI) calculated by a linear regression model mutually including maternal fish intake and mercury levels and further adjusted for maternal plasma levels of polychlorinated biphenyls (the sum of 118, 138, 153, 170, and 180 congeners), dichlorodiphenyldichloroethylene and arsenic, maternal age, maternal pre-pregnancy BMI, parental education, parity, child ethnicity, and cohort. Mean variance inflation factor was 2.9, with all variance inflation factors for the predictors in the model being <10.

**eTable 6.** Associations of Fish Intake During Pregnancy and Maternal Mercury Concentrations With Protein Levels Among Children Aged 8 Years in HELIX (N = 805)

|                               | Fish Intake ( $\geq 1$ time/week) |       | Mercury (log <sub>2</sub> mg/L) |      |
|-------------------------------|-----------------------------------|-------|---------------------------------|------|
|                               | Percent change (95% CI)           | P     | Percent change (95% CI)         | P    |
| <b>JAK-STAT pathway</b>       |                                   |       |                                 |      |
| EGF                           | 10.97 (-20.19, 54.28)             | 0.54  | 5.06 (-4.91, 16.07)             | 0.33 |
| IFN-alpha                     | -0.91 (-15.01, 15.53)             | 0.91  | 1.79 (-2.83, 6.63)              | 0.45 |
| IFN-gamma                     | -3.53 (-22.82, 20.59)             | 0.75  | 3.71 (-3.06, 10.95)             | 0.29 |
| IL-2                          | -2.69 (-22.01, 21.43)             | 0.81  | -2.39 (-8.71, 4.37)             | 0.48 |
| IL-2R                         | 6.15 (-6.69, 20.76)               | 0.36  | -2.88 (-6.59, 0.98)             | 0.14 |
| IL-4                          | 5.49 (-9.76, 23.32)               | 0.5   | 1.56 (-3.13, 6.47)              | 0.52 |
| IL-5                          | -1.40 (-19.16, 20.26)             | 0.89  | -0.3 (-6.11, 5.88)              | 0.92 |
| IL-6                          | -16.24 (-24.89, -6.6)             | 0.001 | 2.5 (-0.82, 5.94)               | 0.14 |
| IL-10                         | 3.13 (-19.39, 31.94)              | 0.81  | 0.69 (-6.54, 8.48)              | 0.86 |
| IL-12                         | 1.21 (-8.59, 12.08)               | 0.82  | 1.63 (-1.45, 4.82)              | 0.3  |
| IL-13                         | 4.26 (-11.52, 22.87)              | 0.62  | -2.31 (-7.04, 2.67)             | 0.36 |
| IL-15                         | -12.78 (-36.24, 19.31)            | 0.39  | 6.98 (-2.69, 17.62)             | 0.16 |
| Leptin                        | -7.10 (-23.26, 12.46)             | 0.45  | 2.66 (-3.11, 8.77)              | 0.37 |
| <i>Pathway effect</i>         | 0.39 (-5.18, 6.29)                | 0.89  | 1.17 (-0.69, 3.05)              | 0.21 |
| <b>Adipocytokine pathway</b>  |                                   |       |                                 |      |
| Adiponectin                   | -11.37 (-18.69, -3.4)             | 0.01  | 0.16 (-2.42, 2.8)               | 0.90 |
| Leptin                        | -7.10 (-23.26, 12.46)             | 0.45  | 2.66 (-3.11, 8.77)              | 0.37 |
| TNF-alpha                     | -5.71 (-10.55, -0.60)             | 0.03  | 0.17 (-1.41, 1.78)              | 0.83 |
| <i>Pathway effect</i>         | -5.76 (-10.88, -0.35)             | 0.04  | 0.39 (-1.41, 2.22)              | 0.66 |
| <b>NF-kappa B pathway</b>     |                                   |       |                                 |      |
| BAFF                          | -1.61 (-6.3, 3.33)                | 0.52  | -0.35 (-1.81, 1.14)             | 0.64 |
| IL-1beta                      | -16.73 (-27.87, -3.86)            | 0.01  | 4.29 (-0.15, 8.92)              | 0.06 |
| IL-8                          | -1.11 (-6.46, 4.56)               | 0.7   | -0.22 (-1.88, 1.48)             | 0.80 |
| MIP-1beta                     | 3.39 (-7.96, 16.14)               | 0.57  | -0.57 (-4, 2.99)                | 0.75 |
| TNF-alpha                     | -5.71 (-10.55, -0.60)             | 0.03  | 0.17 (-1.41, 1.78)              | 0.83 |
| <i>Pathway effect</i>         | 0.79 (-3.47, 5.24)                | 0.71  | 0.14 (-1.25, 1.55)              | 0.84 |
| <b>Chemokine pathway</b>      |                                   |       |                                 |      |
| IL-8                          | -1.11 (-6.46, 4.56)               | 0.7   | -0.22 (-1.88, 1.48)             | 0.8  |
| MCP-1                         | -6.69 (-13.07, 0.15)              | 0.06  | -1.14 (-3.24, 1)                | 0.29 |
| MIG                           | 7.17 (-5.41, 21.42)               | 0.28  | 0.72 (-3.01, 4.59)              | 0.71 |
| MIP-1alpha                    | -1.96 (-11.24, 8.29)              | 0.7   | 1.65 (-1.36, 4.76)              | 0.29 |
| MIP-1beta                     | 3.39 (-7.96, 16.14)               | 0.57  | -0.57 (-4, 2.99)                | 0.75 |
| <i>Pathway effect</i>         | 0.13 (-4.59, 5.08)                | 0.96  | 0.01 (-1.54, 1.59)              | 0.99 |
| <b>Cholesterol metabolism</b> |                                   |       |                                 |      |
| apoA1                         | -5.3 (-12.41, 2.38)               | 0.17  | 0.36 (-1.98, 2.75)              | 0.77 |
| apoB                          | -1.55 (-7.41, 4.67)               | 0.62  | -0.87 (-2.7, 0.98)              | 0.35 |
| apoE                          | -9.68 (-18.66, 0.3)               | 0.06  | -1.19 (-4.27, 1.99)             | 0.46 |
| <i>Pathway effect</i>         | -2.09 (-7.45, 3.58)               | 0.45  | -0.29 (-2.09, 1.55)             | 0.75 |

Abbreviations: apo, apolipoprotein; BAFF, B cell activating factor of the TNF family; EGF, epidermal growth factor; IFN, interferon; IL, interleukin; MCP, methyl-accepting chemotaxis protein; MIG, C-X-C motif chemokine 9; MIP, Macrophage inflammatory protein; TNF-alpha, tumor necrosis factor alpha.

Effect estimates are percent changes (95% CI) in protein levels (in log<sub>2</sub> pg/ml) estimated after using linear regression models mutually including maternal fish intake and mercury concentrations and being further adjusted for maternal age, maternal pre-pregnancy BMI, parental education, parity, child ethnicity, child sex, child age and cohort. The reference category for fish intake is less than 1 time/week. A Bonferroni correction for multiple testing would result in a significance threshold of  $\alpha=0.001$ .

**eTable 7.** Distribution of Exposure and Proteins in Subgroups From the Latent Integrated Analysis Defined With Individuals Assigned to the Most Likely Cluster<sup>a</sup>

|                                                                  | <b>Cluster 1<br/>Low MetS Score<br/>(N=635)</b> | <b>Cluster 2<br/>High MetS Score<br/>(N=170)</b> |
|------------------------------------------------------------------|-------------------------------------------------|--------------------------------------------------|
| <b>Distribution by cohort, n (%)</b>                             |                                                 |                                                  |
| BIB, UK                                                          | 96 (15.1)                                       | 8 (4.7)                                          |
| EDEN, France                                                     | 96 (15.1)                                       | 47 (27.6)                                        |
| INMA, Spain                                                      | 140 (22.0)                                      | 64 (37.6)                                        |
| MoBa, Norway                                                     | 191 (30.1)                                      | 20 (11.8)                                        |
| RHEA, Greece                                                     | 112 (17.7)                                      | 31 (18.2)                                        |
| <b>Exposures</b>                                                 |                                                 |                                                  |
| Fish intake during pregnancy, n (%)                              |                                                 |                                                  |
| <1 times/week                                                    | 81 (12.8)                                       | 36 (21.2)                                        |
| ≥1 but ≤3 times/week                                             | 261 (41.1)                                      | 56 (32.9)                                        |
| >3 times/week                                                    | 293 (46.1)                                      | 78 (45.9)                                        |
| Mercury, median (25 <sup>th</sup> ,75 <sup>th</sup> ), µg/L      | 2.3 (1.4, 3.9)                                  | 3.4 (2.0, 5.5)                                   |
| <b>Metabolic risk factors</b>                                    |                                                 |                                                  |
| WC, mean (SD), cm                                                | 56.5 (4.7)                                      | 69.7 (7.6)                                       |
| HDL, mean (SD), mg/dL                                            | 61.4 (12.6)                                     | 55.6 (10.9)                                      |
| TG, median (25 <sup>th</sup> ,75 <sup>th</sup> ), mg/dL          | 70.9 (55.8, 93.0)                               | 93.0 (70.2, 125.8)                               |
| Insulin, median (25 <sup>th</sup> ,75 <sup>th</sup> ), µU/mL     | 5.0 (4.0, 7.1)                                  | 8.7 (6.0, 12.5)                                  |
| BP, mean (SD), mm Hg                                             |                                                 |                                                  |
| Systolic                                                         | 98.9 (10.2)                                     | 106.1 (10.1)                                     |
| Diastolic                                                        | 57.4 (9.5)                                      | 60.9 (8.5)                                       |
| <b>Proteins</b>                                                  |                                                 |                                                  |
| Adiponectin, median (25 <sup>th</sup> ,75 <sup>th</sup> ), µg/mL | 25.1 (19.6, 29.7)                               | 23.5 (16.9, 28.9)                                |
| Leptin, median (25 <sup>th</sup> ,75 <sup>th</sup> ), ng/mL      | 1.0 (0.5, 1.7)                                  | 1.9 (0.8, 3.5)                                   |
| TNF-alpha, median (25 <sup>th</sup> ,75 <sup>th</sup> ), pg/mL   | 30.2 (26.3, 32.3)                               | 32.1 (30.2, 36.5)                                |
| IL-1beta, median (25 <sup>th</sup> ,75 <sup>th</sup> ), pg/mL    | 9.5 (7.3, 12.7)                                 | 34.8 (25.8, 51.7)                                |
| IL-6, median (25 <sup>th</sup> ,75 <sup>th</sup> ), pg/mL        | 9.6 (7.8, 11.7)                                 | 23.2 (17.9, 30.9)                                |

Abbreviations: BP, blood pressure; HDL, high-density lipoprotein cholesterol; IL, interleukin; MetS, metabolic syndrome; TG, triglycerides; WC, waist circumference.

<sup>a</sup>Posterior probability cutoff: 0.5.

**eFigure 1.** Directed Acyclic Graph on the Association of Maternal Fish Intake During Pregnancy and Metabolic Health in Children

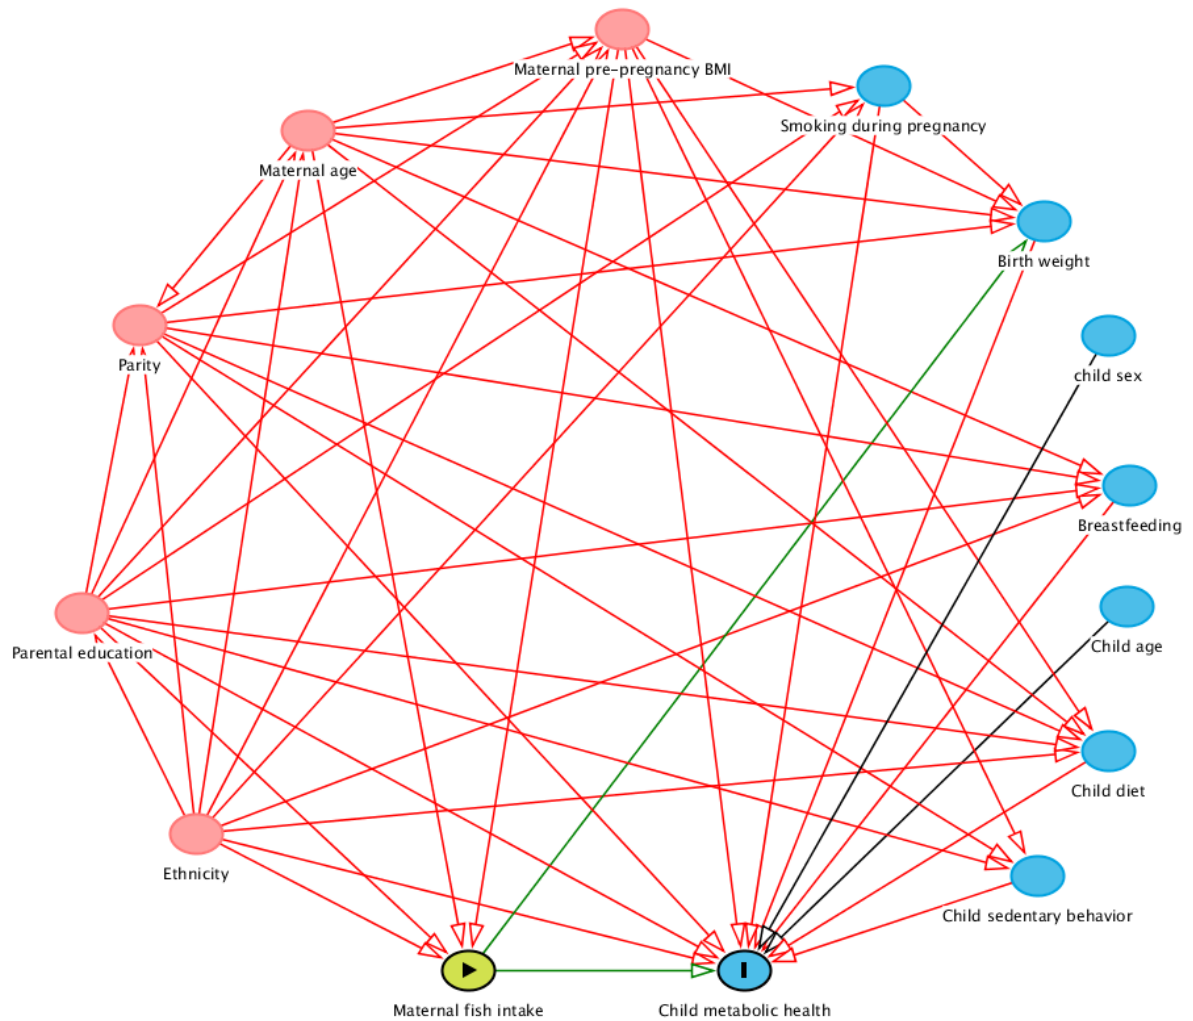

Red nodes represent ancestors of the exposure and outcome; blue nodes represent ancestors of the outcome. Graph was constructed using DAGitty version 2.2.<sup>3</sup>

**eFigure 2.** Associations of Fish Intake During Pregnancy and Maternal Mercury Levels With Metabolic Syndrome Score Among Children Aged 8 Years in HELIX After Omitting 1 Cohort at a Time

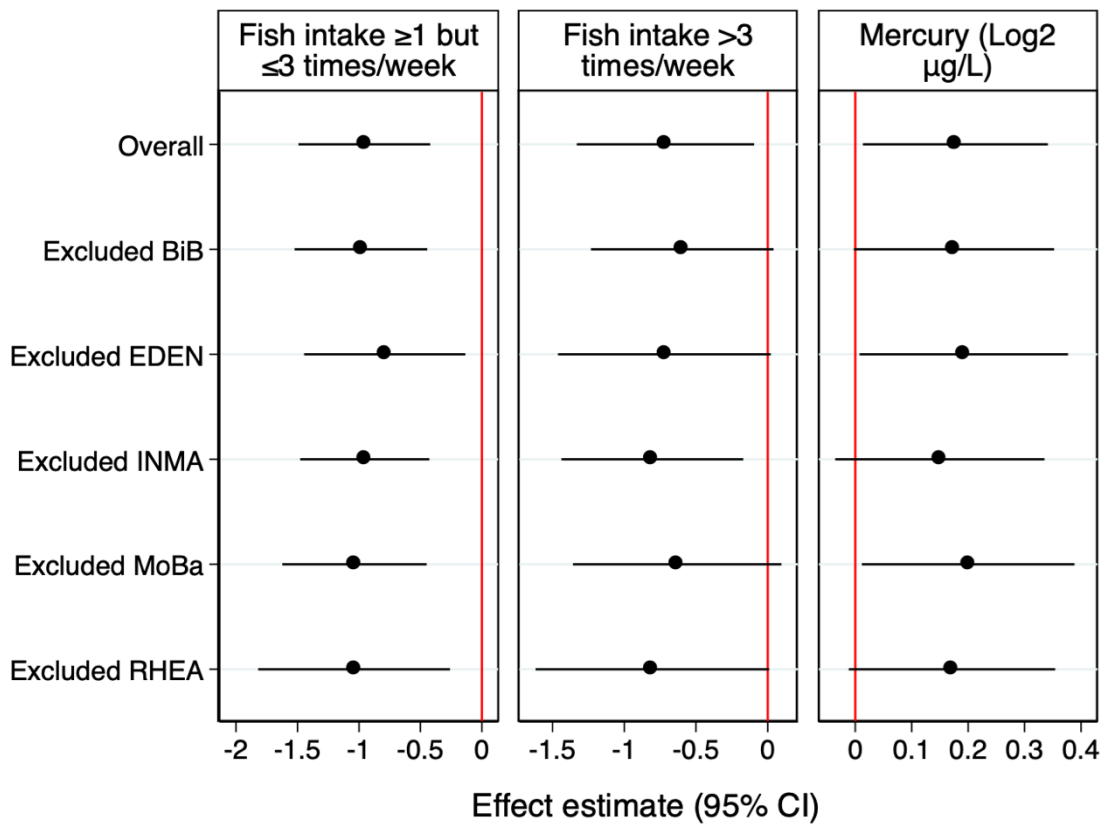

The metabolic syndrome score is expressed in standard deviations and was derived using z-scores for waist circumference, systolic and diastolic blood pressure, high-density lipoprotein cholesterol, triglycerides, and insulin, as described in the Methods section. Effect estimates represent beta coefficients (circles) and 95% CIs (error bars) calculated by linear regression models mutually including maternal fish intake and mercury concentration and further adjusted for maternal age, maternal pre-pregnancy BMI, parental education, parity, child ethnicity, and cohort. For fish intake, the reference category is less than 1 time/week. BiB, Born in Bradford cohort; EDEN, the Étude des Déterminants pré et postnataux du développement et de la santé de l'Enfant study; INMA, INfancia y Medio Ambiente cohort; MoBa, Norwegian Mother, Father and Child Cohort Study; RHEA, Rhea Mother Child Cohort study.

## eReferences

1. Haug LS, Sakhi AK, Cequier E, et al. In-utero and childhood chemical exposome in six European mother-child cohorts. *Environ Int*. 2018;121(pt 1):751-763.
2. Peng C, Wang J, Asante I, et al. A latent unknown clustering integrating multi-omics data (LUCID) with phenotypic traits. *Bioinformatics* [published online August 29, 2019].
3. Textor J, Hardt J, Knuppel S. DAGitty: a graphical tool for analyzing causal diagrams. *Epidemiology*. 2011;22(5):745.
